# Supplementary material for: A DSM-5 AMPD and ICD-11 compatible measure for an early identification of personality disorders in adolescence–LoPF-Q 12–18 latent structure and short form
Source: PubMed Central journal article supplement (PMC9491532; doi:10.1371/journal.pone.0269327), 2022-09-21
Supplement: pone.0269327.s002.pdf [file pone.0269327.s002.pdf]

**Supplemental table.** Energy consumption and CPU time for item permutation - Need for an optimised item selection algorithm

|                                                          | <b>Different item combinations</b> | <b>Estimated CPU time <sup>1</sup></b> | <b>Energy required <sup>2</sup></b> | <b>CO2 Emission <sup>3</sup></b> |
|----------------------------------------------------------|------------------------------------|----------------------------------------|-------------------------------------|----------------------------------|
| Random selection of 20 / 97 items <sup>a</sup>           | $2.72 \times 10^{20}$              | ~ twenty trillion years                | 2.8 million TWh                     | 26 thousand Tt                   |
| Random selection of 4 items for each domain <sup>b</sup> | $6.25 \times 10^{18}$              | ~500 billion years                     | 65,000 TWh                          | 605 Tt                           |
| 100,000 random combinations of items (5 per domain)      | 100,000                            | 2.89 days                              | ~1 kWh                              | 9.7g                             |
| Ant colony optimization                                  |                                    | ~ 4 hours                              | 60Wh                                | 0.6g                             |

*Note.* Possible combinations were calculated using formulae <sup>a</sup>  $\binom{97}{20}$  and <sup>b</sup>  $\binom{26}{5} \times \binom{23}{5} \times \binom{25}{5} \times \binom{25}{5}$

<sup>1</sup> CPU time was assessed using the R function proc.time. For a standard home computer (Core(TM) i7-8550U CPU 1.99 GHz) the average CPU time per item combination was 2.5 sec.

<sup>2</sup> Intel referenced power consumption of the aforementioned processor as 15W

<sup>3</sup> For Switzerland CO<sub>2</sub> emissions have been estimated as 9.3g per produced kWh.
